# Supplementary material
Source: PubMed Central journal article supplement (PMC10086626)
Supplement: djac238_supplementary_data.pdf [file djac238_supplementary_data.pdf]

**SUPPLEMENTARY MATERIAL**

**Supplementary Table 1. Age-adjusted incidence rates (AAIR) and incidence rate ratios (IRR) and 95% confidence interval by % rural in California (2015-2019), overall.**

| Cancer Site | %Rural                     | Population | Case   | Overall                   |                            |                  |
|-------------|----------------------------|------------|--------|---------------------------|----------------------------|------------------|
|             |                            |            |        | AAIR                      | IRR                        | P                |
| Breast      | 0%                         | 57,151,857 | 76,783 | 120.45 (119.59 to 121.33) | 1.00                       |                  |
|             | 0<-<10%                    | 26,439,189 | 39,785 | 131.06 (129.74 to 132.38) | <b>1.09 (1.07 to 1.10)</b> | <b>&lt;.0001</b> |
|             | 10%<-<20%                  | 6,962,410  | 10,386 | 126.15 (123.66 to 128.68) | <b>1.05 (1.03 to 1.07)</b> | <b>&lt;.0001</b> |
|             | 20%<-<30%                  | 2,789,004  | 3,560  | 119.32 (115.34 to 123.40) | <b>0.99 (0.96 to 1.03)</b> | <b>0.6487</b>    |
|             | 30%<-<40%                  | 1,516,378  | 1,945  | 111.43 (106.32 to 116.73) | <b>0.93 (0.88 to 0.97)</b> | <b>0.0013</b>    |
|             | 40%<-<50%                  | 1,262,773  | 1,902  | 114.59 (109.21 to 120.19) | 0.95 (0.91 to 1.00)        | 0.0513           |
|             | 50%+                       | 2,855,014  | 4,758  | 114.79 (111.29 to 118.37) | <b>0.95 (0.92 to 0.98)</b> | <b>0.0032</b>    |
|             | <i>P for trend of AAIR</i> |            |        |                           |                            | <i>0.7559</i>    |
| Prostate    | 0%                         | 55,959,826 | 52,270 | 90.67 (89.88 to 91.47)    | 1.00                       |                  |
|             | 0<-<10%                    | 26,023,709 | 29,965 | 104.35 (103.14 to 105.56) | <b>1.15 (1.13 to 1.17)</b> | <b>&lt;.0001</b> |
|             | 10%<-<20%                  | 6,966,672  | 8,122  | 99.46 (97.26 to 101.70)   | <b>1.10 (1.07 to 1.12)</b> | <b>&lt;.0001</b> |
|             | 20%<-<30%                  | 2,916,986  | 2,861  | 94.38 (90.84 to 98.03)    | <b>1.04 (1.00 to 1.08)</b> | <b>0.0458</b>    |
|             | 30%<-<40%                  | 1,606,604  | 1,803  | 94.33 (89.91 to 98.93)    | 1.04 (0.99 to 1.09)        | 0.1084           |
|             | 40%<-<50%                  | 1,359,226  | 1,773  | 95.05 (90.55 to 99.74)    | 1.05 (1.00 to 1.10)        | 0.0607           |
|             | 50%+                       | 2,982,835  | 4,367  | 92.09 (89.29 to 94.98)    | 1.02 (0.98 to 1.05)        | 0.3446           |
|             | <i>P for trend of AAIR</i> |            |        |                           |                            | <i>0.6005</i>    |
| Male/Lung   | 0%                         | 55,959,826 | 22,865 | 43.11 (42.54 to 43.69)    | 1.00                       |                  |
|             | 0<-<10%                    | 26,023,709 | 11,403 | 43.69 (42.88 to 44.52)    | 1.01 (0.99 to 1.04)        | 0.2539           |
|             | 10%<-<20%                  | 6,966,672  | 3,278  | 44.08 (42.55 to 45.65)    | 1.02 (0.98 to 1.06)        | 0.2410           |
|             | 20%<-<30%                  | 2,916,986  | 1,242  | 46.03 (43.43 to 48.75)    | <b>1.07 (1.01 to 1.13)</b> | <b>0.0312</b>    |
|             | 30%<-<40%                  | 1,606,604  | 886    | 50.24 (46.90 to 53.77)    | <b>1.17 (1.09 to 1.25)</b> | <b>&lt;.0001</b> |
|             | 40%<-<50%                  | 1,359,226  | 705    | 41.87 (38.73 to 45.20)    | 0.97 (0.90 to 1.05)        | 0.4992           |
|             | 50%+                       | 2,982,835  | 2,139  | 48.96 (46.83 to 51.17)    | <b>1.14 (1.08 to 1.19)</b> | <b>&lt;.0001</b> |
|             | <i>P for trend of AAIR</i> |            |        |                           |                            | <i>0.0348</i>    |
| Female/Lung | 0%                         | 57,151,857 | 22,527 | 33.65 (33.20 to 34.09)    | 1.00                       |                  |
|             | 0<-<10%                    | 26,439,189 | 12,151 | 38.54 (37.84 to 39.24)    | <b>1.15 (1.12 to 1.17)</b> | <b>&lt;.0001</b> |
|             | 10%<-<20%                  | 6,962,410  | 3,315  | 37.69 (36.40 to 39.02)    | <b>1.12 (1.08 to 1.16)</b> | <b>&lt;.0001</b> |
|             | 20%<-<30%                  | 2,789,004  | 1,097  | 36.49 (34.33 to 38.76)    | <b>1.08 (1.02 to 1.15)</b> | <b>0.0108</b>    |
|             | 30%<-<40%                  | 1,516,378  | 854    | 44.60 (41.60 to 47.77)    | <b>1.33 (1.23 to 1.42)</b> | <b>&lt;.0001</b> |
|             | 40%<-<50%                  | 1,262,773  | 738    | 41.08 (38.10 to 44.26)    | <b>1.22 (1.13 to 1.32)</b> | <b>&lt;.0001</b> |
|             | 50%+                       | 2,855,014  | 2,098  | 45.43 (43.44 to 47.49)    | <b>1.35 (1.29 to 1.41)</b> | <b>&lt;.0001</b> |
|             | <i>P for trend of AAIR</i> |            |        |                           |                            | <i>0.0123</i>    |
| Male/CRC    | 0%                         | 55,959,826 | 21,842 | 39.41 (38.88 to 39.95)    | 1.00                       |                  |
|             | 0<-<10%                    | 26,023,709 | 10,465 | 38.97 (38.21 to 39.74)    | 0.99 (0.97 to 1.01)        | 0.3621           |
|             | 10%<-<20%                  | 6,966,672  | 2,956  | 39.17 (37.74 to 40.65)    | 0.99 (0.96 to 1.03)        | 0.8003           |
|             | 20%<-<30%                  | 2,916,986  | 1,146  | 40.41 (38.04 to 42.90)    | 1.03 (0.96 to 1.09)        | 0.4197           |
|             | 30%<-<40%                  | 1,606,604  | 677    | 39.55 (36.54 to 42.75)    | 1.00 (0.93 to 1.09)        | 0.9147           |
|             | 40%<-<50%                  | 1,359,226  | 578    | 35.73 (32.77 to 38.90)    | <b>0.91 (0.83 to 0.99)</b> | <b>0.0271</b>    |
|             | 50%+                       | 2,982,835  | 1,547  | 37.34 (35.40 to 39.37)    | <b>0.95 (0.90 to 1.00)</b> | <b>0.0580</b>    |
|             | <i>P for trend of AAIR</i> |            |        |                           |                            | <i>0.0950</i>    |
| Female/CRC  | 0%                         | 57,151,857 | 19,787 | 30.11 (29.69 to 30.54)    | 1.00                       |                  |
|             | 0<-<10%                    | 26,439,189 | 9,687  | 31.37 (30.74 to 32.02)    | <b>1.04 (1.02 to 1.07)</b> | <b>0.0011</b>    |
|             | 10%<-<20%                  | 6,962,410  | 2,524  | 30.03 (28.84 to 31.26)    | 1.00 (0.96 to 1.04)        | 0.9298           |
|             | 20%<-<30%                  | 2,789,004  | 915    | 30.92 (28.91 to 33.04)    | 1.03 (0.96 to 1.10)        | 0.4332           |
|             | 30%<-<40%                  | 1,516,378  | 534    | 30.56 (27.93 to 33.38)    | 1.01 (0.93 to 1.11)        | 0.7404           |
|             | 40%<-<50%                  | 1,262,773  | 488    | 29.42 (26.74 to 32.30)    | 0.98 (0.89 to 1.08)        | 0.6919           |
|             | 50%+                       | 2,855,014  | 1,394  | 33.28 (31.46 to 35.19)    | <b>1.11 (1.04 to 1.17)</b> | <b>0.0007</b>    |
|             | <i>P for trend of AAIR</i> |            |        |                           |                            | <i>0.1712</i>    |

|                 |                            |            |        |                        |                            |                  |
|-----------------|----------------------------|------------|--------|------------------------|----------------------------|------------------|
| Male/Melanoma   | 0%                         | 55,959,826 | 13,844 | 25.42 (24.99 to 25.85) | 1.00                       |                  |
|                 | 0<-<10%                    | 26,023,709 | 9,926  | 37.54 (36.79 to 38.31) | <b>1.48 (1.44 to 1.52)</b> | <b>&lt;.0001</b> |
|                 | 10%<-<20%                  | 6,966,672  | 2,775  | 36.90 (35.51 to 38.34) | <b>1.45 (1.39 to 1.51)</b> | <b>&lt;.0001</b> |
|                 | 20%<-<30%                  | 2,916,986  | 918    | 33.31 (31.12 to 35.60) | <b>1.31 (1.22 to 1.40)</b> | <b>&lt;.0001</b> |
|                 | 30%<-<40%                  | 1,606,604  | 518    | 29.40 (26.84 to 32.13) | <b>1.16 (1.05 to 1.27)</b> | <b>0.0021</b>    |
|                 | 40%<-<50%                  | 1,359,226  | 564    | 33.46 (30.65 to 36.47) | <b>1.32 (1.20 to 1.44)</b> | <b>&lt;.0001</b> |
|                 | 50%+                       | 2,982,835  | 1,599  | 38.67 (36.70 to 40.73) | <b>1.52 (1.44 to 1.61)</b> | <b>&lt;.0001</b> |
|                 | <i>P for trend of AAIR</i> |            |        |                        |                            | <i>0.1166</i>    |
| Female/Melanoma | 0%                         | 57,151,857 | 9,255  | 14.38 (14.09 to 14.69) | 1.00                       |                  |
|                 | 0<-<10%                    | 26,439,189 | 6,444  | 21.34 (20.81 to 21.88) | <b>1.48 (1.44 to 1.53)</b> | <b>&lt;.0001</b> |
|                 | 10%<-<20%                  | 6,962,410  | 1,876  | 22.93 (21.87 to 24.02) | <b>1.59 (1.51 to 1.68)</b> | <b>&lt;.0001</b> |
|                 | 20%<-<30%                  | 2,789,004  | 622    | 21.30 (19.63 to 23.08) | <b>1.48 (1.36 to 1.61)</b> | <b>&lt;.0001</b> |
|                 | 30%<-<40%                  | 1,516,378  | 350    | 20.04 (17.91 to 22.35) | <b>1.39 (1.24 to 1.56)</b> | <b>&lt;.0001</b> |
|                 | 40%<-<50%                  | 1,262,773  | 377    | 23.19 (20.80 to 25.79) | <b>1.61 (1.44 to 1.80)</b> | <b>&lt;.0001</b> |
|                 | 50%+                       | 2,855,014  | 1,008  | 25.74 (24.03 to 27.54) | <b>1.79 (1.67 to 1.92)</b> | <b>&lt;.0001</b> |
|                 | <i>P for trend of AAIR</i> |            |        |                        |                            | <i>0.0368</i>    |

**Supplementary Table 2. Age-adjusted incidence rates (AAIR) and incidence rate ratios (IRR) and 95% confidence interval by % rural in California (2015-2019), Hispanic.**

| Hispanic      |                            |            |        |                           |                            |                  |
|---------------|----------------------------|------------|--------|---------------------------|----------------------------|------------------|
| Cancer Site   | %Rural                     | Population | Case   | AAIR                      | IRR                        | P-value          |
| Breast        | 0%                         | 23,514,561 | 18,137 | 93.13 (91.75 to 94.53)    | 1.00                       |                  |
|               | 0<-<10%                    | 8,996,590  | 7,234  | 103.44 (101.00 to 105.93) | <b>1.11 (1.08 to 1.14)</b> | <b>&lt;.0001</b> |
|               | 10%<-<20%                  | 2,685,723  | 2,065  | 97.54 (93.29 to 101.93)   | <b>1.05 (1.00 to 1.10)</b> | <b>0.0511</b>    |
|               | 20%<-<30%                  | 1,381,140  | 965    | 92.27 (86.38 to 98.44)    | 0.99 (0.93 to 1.06)        | 0.8555           |
|               | 30%<-<40%                  | 587,064    | 384    | 90.08 (81.06 to 99.80)    | 0.97 (0.87 to 1.08)        | 0.5860           |
|               | 40%<-<50%                  | 407,947    | 247    | 79.55 (69.49 to 90.63)    | <b>0.85 (0.75 to 0.98)</b> | <b>0.0238</b>    |
|               | 50%+                       | 580,101    | 456    | 95.25 (86.45 to 104.68)   | 1.02 (0.93 to 1.13)        | 0.6329           |
|               | <i>P for trend of AAIR</i> |            |        |                           |                            |                  |
| Prostate      | 0%                         | 23,520,324 | 11,213 | 77.75 (76.22 to 79.30)    | 1.00                       |                  |
|               | 0<-<10%                    | 9,060,793  | 4,570  | 88.45 (85.71 to 91.23)    | <b>1.14 (1.10 to 1.18)</b> | <b>&lt;.0001</b> |
|               | 10%<-<20%                  | 2,775,489  | 1,459  | 84.84 (80.28 to 89.58)    | <b>1.09 (1.03 to 1.16)</b> | <b>0.0032</b>    |
|               | 20%<-<30%                  | 1,480,288  | 687    | 79.06 (72.89 to 85.58)    | 1.02 (0.94 to 1.10)        | 0.6980           |
|               | 30%<-<40%                  | 645,612    | 277    | 76.27 (66.98 to 86.39)    | 0.98 (0.86 to 1.12)        | 0.8535           |
|               | 40%<-<50%                  | 484,937    | 204    | 72.79 (62.25 to 84.46)    | 0.94 (0.80 to 1.10)        | 0.4491           |
|               | 50%+                       | 651,107    | 356    | 76.35 (68.16 to 85.19)    | 0.98 (0.88 to 1.10)        | 0.8248           |
|               | <i>P for trend of AAIR</i> |            |        |                           |                            |                  |
| Male/Lung     | 0%                         | 23,520,324 | 3,404  | 27.91 (26.92 to 28.91)    | 1.00                       |                  |
|               | 0<-<10%                    | 9,060,793  | 1,223  | 28.21 (26.55 to 29.93)    | 1.01 (0.94 to 1.08)        | 0.7330           |
|               | 10%<-<20%                  | 2,775,489  | 442    | 30.36 (27.45 to 33.46)    | 1.09 (0.98 to 1.21)        | 0.1135           |
|               | 20%<-<30%                  | 1,480,288  | 216    | 29.50 (25.48 to 33.91)    | 1.06 (0.91 to 1.23)        | 0.4624           |
|               | 30%<-<40%                  | 645,612    | 115    | 33.92 (27.61 to 41.11)    | 1.22 (0.99 to 1.49)        | 0.0616           |
|               | 40%<-<50%                  | 484,937    | 55     | 22.52 (16.44 to 29.87)    | 0.81 (0.59 to 1.10)        | 0.1938           |
|               | 50%+                       | 651,107    | 103    | 24.99 (20.15 to 30.56)    | 0.90 (0.72 to 1.11)        | 0.3635           |
|               | <i>P for trend of AAIR</i> |            |        |                           |                            |                  |
| Female/Lung   | 0%                         | 23,514,561 | 3,192  | 19.03 (18.36 to 19.72)    | 1.00                       |                  |
|               | 0<-<10%                    | 8,996,590  | 1,340  | 22.93 (21.68 to 24.23)    | <b>1.20 (1.13 to 1.29)</b> | <b>&lt;.0001</b> |
|               | 10%<-<20%                  | 2,685,723  | 392    | 22.12 (19.94 to 24.47)    | <b>1.16 (1.04 to 1.30)</b> | <b>0.0073</b>    |
|               | 20%<-<30%                  | 1,381,140  | 172    | 19.77 (16.82 to 23.05)    | 1.04 (0.88 to 1.22)        | 0.6504           |
|               | 30%<-<40%                  | 587,064    | 78     | 22.41 (17.54 to 28.12)    | 1.18 (0.92 to 1.49)        | 0.1904           |
|               | 40%<-<50%                  | 407,947    | 55     | 21.96 (16.24 to 28.88)    | 1.15 (0.85 to 1.54)        | 0.3460           |
|               | 50%+                       | 580,101    | 117    | 27.16 (22.26 to 32.75)    | <b>1.43 (1.17 to 1.74)</b> | <b>0.0006</b>    |
|               | <i>P for trend of AAIR</i> |            |        |                           |                            |                  |
| Male/CRC      | 0%                         | 23,520,324 | 5,837  | 37.56 (36.53 to 38.62)    | 1.00                       |                  |
|               | 0<-<10%                    | 9,060,793  | 2,187  | 39.18 (37.40 to 41.01)    | 1.04 (0.99 to 1.10)        | 0.1143           |
|               | 10%<-<20%                  | 2,775,489  | 768    | 40.50 (37.49 to 43.67)    | 1.08 (0.99 to 1.17)        | 0.0676           |
|               | 20%<-<30%                  | 1,480,288  | 345    | 36.71 (32.69 to 41.06)    | 0.98 (0.87 to 1.10)        | 0.7761           |
|               | 30%<-<40%                  | 645,612    | 141    | 36.64 (30.39 to 43.71)    | 0.98 (0.81 to 1.17)        | 0.8974           |
|               | 40%<-<50%                  | 484,937    | 102    | 32.21 (25.56 to 39.94)    | 0.86 (0.68 to 1.08)        | 0.2199           |
|               | 50%+                       | 651,107    | 156    | 35.02 (29.41 to 41.32)    | 0.93 (0.78 to 1.11)        | 0.4962           |
|               | <i>P for trend of AAIR</i> |            |        |                           |                            |                  |
| Female/CRC    | 0%                         | 23,514,561 | 5,181  | 27.80 (27.03 to 28.58)    | 1.00                       |                  |
|               | 0<-<10%                    | 8,996,590  | 1,954  | 29.64 (28.29 to 31.03)    | <b>1.07 (1.01 to 1.13)</b> | <b>0.0188</b>    |
|               | 10%<-<20%                  | 2,685,723  | 544    | 26.14 (23.94 to 28.49)    | 0.94 (0.86 to 1.03)        | 0.2013           |
|               | 20%<-<30%                  | 1,381,140  | 249    | 24.91 (21.81 to 28.32)    | 0.90 (0.78 to 1.03)        | 0.1214           |
|               | 30%<-<40%                  | 587,064    | 119    | 30.33 (24.93 to 36.48)    | 1.09 (0.89 to 1.32)        | 0.3829           |
|               | 40%<-<50%                  | 407,947    | 70     | 24.21 (18.54 to 30.97)    | 0.87 (0.67 to 1.13)        | 0.3590           |
|               | 50%+                       | 580,101    | 131    | 29.21 (24.24 to 34.85)    | 1.05 (0.87 to 1.26)        | 0.5881           |
|               | <i>P for trend of AAIR</i> |            |        |                           |                            |                  |
| Male/Melanoma | 0%                         | 23,520,324 | 656    | 4.47 (4.11 to 4.85)       | 1.00                       |                  |

|                 |                                |            |     |                      |                            |                  |
|-----------------|--------------------------------|------------|-----|----------------------|----------------------------|------------------|
|                 | 0<-<10%                        | 9,060,793  | 306 | 5.58 (4.91 to 6.30)  | <b>1.25 (1.07 to 1.45)</b> | <b>0.0045</b>    |
|                 | 10%-<20%                       | 2,775,489  | 100 | 5.38 (4.31 to 6.61)  | 1.20 (0.95 to 1.52)        | 0.1264           |
|                 | 20%-<30%                       | 1,480,288  | 36  | 3.75 (2.55 to 5.29)  | 0.84 (0.57 to 1.23)        | 0.4495           |
|                 | 30%-<40%                       | 645,612    | 15  | 3.61 (1.89 to 6.15)  | 0.81 (0.42 to 1.47)        | 0.6593           |
|                 | 40%-<50%                       | 484,937    | 15  | 3.92 (2.11 to 6.68)  | 0.88 (0.47 to 1.62)        | 0.9745           |
|                 | 50%+                           | 651,107    | 27  | 5.60 (3.59 to 8.28)  | 1.25 (0.80 to 1.93)        | 0.3283           |
|                 | <i>P for trend<br/>of AAIR</i> |            |     |                      |                            | <i>0.0908</i>    |
| Female/Melanoma | 0%                             | 23,514,561 | 882 | 4.56 (4.25 to 4.88)  | 1.00                       |                  |
|                 | 0<-<10%                        | 8,996,590  | 439 | 6.20 (5.61 to 6.82)  | <b>1.36 (1.20 to 1.53)</b> | <b>&lt;.0001</b> |
|                 | 10%-<20%                       | 2,685,723  | 154 | 7.41 (6.26 to 8.71)  | <b>1.63 (1.35 to 1.95)</b> | <b>&lt;.0001</b> |
|                 | 20%-<30%                       | 1,381,140  | 56  | 5.10 (3.81 to 6.69)  | 1.12 (0.83 to 1.50)        | 0.4618           |
|                 | 30%-<40%                       | 587,064    | 32  | 7.75 (5.19 to 11.07) | <b>1.70 (1.13 to 2.51)</b> | <b>0.0115</b>    |
|                 | 40%-<50%                       | 407,947    | 15  | 4.67 (2.48 to 7.93)  | 1.02 (0.54 to 1.86)        | 1.0000           |
|                 | 50%+                           | 580,101    | 41  | 7.96 (5.66 to 10.88) | <b>1.75 (1.23 to 2.45)</b> | <b>0.0021</b>    |
|                 | <i>P for trend<br/>of AAIR</i> |            |     |                      |                            | <i>0.0908</i>    |

**Supplementary Table 3. Age-adjusted incidence rates (AAIR) and incidence rate ratios (IRR) and 95% confidence interval by % rural in California 2015-2019, non-Hispanic Asian American/Pacific Islander.**

| Cancer Site                | %Rural                     | API        |        |                           |                            | P-value          |
|----------------------------|----------------------------|------------|--------|---------------------------|----------------------------|------------------|
|                            |                            | Population | Case   | AAIR                      | IRR                        |                  |
| Breast                     | 0%                         | 11,272,794 | 14,570 | 106.58 (104.82 to 108.36) | 1.00                       |                  |
|                            | 0<-<10%                    | 3,735,408  | 4,940  | 115.10 (111.87 to 118.41) | <b>1.08 (1.04 to 1.12)</b> | <b>&lt;.0001</b> |
|                            | 10%<-<20%                  | 663,376    | 829    | 110.36 (102.86 to 118.27) | 1.04 (0.96 to 1.11)        | 0.3387           |
|                            | 20%<-<30%                  | 128,369    | 179    | 108.94 (93.23 to 126.59)  | 1.02 (0.87 to 1.19)        | 0.7779           |
|                            | 30%<-<40%                  | 56,921     | 80     | 92.58 (72.83 to 116.11)   | 0.87 (0.68 to 1.10)        | 0.2821           |
|                            | 40%<-<50%                  | 31,260     | 49     | 99.75 (72.88 to 133.60)   | 0.94 (0.68 to 1.27)        | 0.7960           |
|                            | 50%+                       | 112,869    | 118    | 85.37 (70.19 to 103.04)   | <b>0.80 (0.66 to 0.97)</b> | <b>0.0226</b>    |
|                            | <i>P for trend of AAIR</i> |            |        |                           |                            | <i>0.9247</i>    |
| Prostate                   | 0%                         | 10,222,964 | 5,785  | 49.36 (48.08 to 50.67)    | 1.00                       |                  |
|                            | 0<-<10%                    | 3,372,416  | 2,008  | 59.28 (56.64 to 62.02)    | <b>1.20 (1.14 to 1.27)</b> | <b>&lt;.0001</b> |
|                            | 10%<-<20%                  | 600,871    | 385    | 62.80 (56.49 to 69.62)    | <b>1.27 (1.14 to 1.42)</b> | <b>&lt;.0001</b> |
|                            | 20%<-<30%                  | 135,984    | 79     | 56.44 (44.22 to 71.02)    | 1.14 (0.89 to 1.45)        | 0.2919           |
|                            | 30%<-<40%                  | 62,121     | 32     | 47.34 (31.57 to 68.16)    | 0.96 (0.64 to 1.42)        | 1.0000           |
|                            | 40%<-<50%                  | 28,831     | 22     | 50.58 (30.81 to 78.85)    | 1.02 (0.62 to 1.65)        | 0.9576           |
|                            | 50%+                       | 87,242     | 55     | 49.17 (36.40 to 65.03)    | 1.00 (0.74 to 1.33)        | 1.0000           |
|                            | <i>P for trend of AAIR</i> |            |        |                           |                            | <i>0.1683</i>    |
| Male/Lung                  | 0%                         | 10,222,964 | 4,883  | 43.71 (42.48 to 44.98)    | 1.00                       |                  |
|                            | 0<-<10%                    | 3,372,416  | 1,259  | 41.03 (38.73 to 43.43)    | <b>0.94 (0.88 to 1.00)</b> | <b>0.0542</b>    |
|                            | 10%<-<20%                  | 600,871    | 192    | 34.18 (29.38 to 39.53)    | <b>0.78 (0.67 to 0.91)</b> | <b>0.0010</b>    |
|                            | 20%<-<30%                  | 135,984    | 46     | 38.46 (27.84 to 51.67)    | 0.88 (0.64 to 1.19)        | 0.4754           |
|                            | 30%<-<40%                  | 62,121     | 24     | 40.06 (24.93 to 60.62)    | 0.92 (0.57 to 1.43)        | 0.8780           |
|                            | 40%<-<50%                  | 28,831     | <15    | —                         | —                          | —                |
|                            | 50%+                       | 87,242     | 25     | 23.28 (14.75 to 34.98)    | <b>0.53 (0.34 to 0.81)</b> | <b>0.0020</b>    |
| <i>P for trend of AAIR</i> |                            |            |        |                           | <b>0.0206</b>              |                  |
| Female/Lung                | 0%                         | 11,272,794 | 4,069  | 27.90 (27.03 to 28.78)    | 1.00                       |                  |
|                            | 0<-<10%                    | 3,735,408  | 1,139  | 28.09 (26.45 to 29.81)    | 1.01 (0.94 to 1.08)        | 0.8435           |
|                            | 10%<-<20%                  | 663,376    | 210    | 27.71 (24.03 to 31.82)    | 0.99 (0.86 to 1.15)        | 0.9764           |
|                            | 20%<-<30%                  | 128,369    | 46     | 27.39 (19.91 to 36.85)    | 0.98 (0.71 to 1.33)        | 1.0000           |
|                            | 30%<-<40%                  | 56,921     | 21     | 24.43 (14.94 to 37.81)    | 0.88 (0.53 to 1.37)        | 0.6926           |
|                            | 40%<-<50%                  | 31,260     | 15     | 32.77 (17.78 to 55.36)    | 1.17 (0.64 to 2.03)        | 0.6336           |
|                            | 50%+                       | 112,869    | 36     | 28.13 (19.40 to 39.55)    | 1.01 (0.69 to 1.43)        | 0.9889           |
|                            | <i>P for trend of AAIR</i> |            |        |                           |                            | <i>0.9378</i>    |
| Male/CRC                   | 0%                         | 10,222,964 | 4,183  | 37.11 (35.98 to 38.27)    | 1.00                       |                  |
|                            | 0<-<10%                    | 3,372,416  | 1,132  | 33.75 (31.76 to 35.83)    | <b>0.91 (0.85 to 0.97)</b> | <b>0.0058</b>    |
|                            | 10%<-<20%                  | 600,871    | 199    | 32.56 (28.08 to 37.54)    | 0.88 (0.75 to 1.02)        | 0.0857           |
|                            | 20%<-<30%                  | 135,984    | 46     | 35.98 (26.02 to 48.44)    | 0.97 (0.70 to 1.32)        | 0.9610           |
|                            | 30%<-<40%                  | 62,121     | 27     | 40.29 (25.89 to 59.74)    | 1.09 (0.70 to 1.67)        | 0.7396           |
|                            | 40%<-<50%                  | 28,831     | 15     | 38.83 (20.99 to 65.79)    | 1.05 (0.57 to 1.85)        | 0.9345           |
|                            | 50%+                       | 87,242     | 36     | 32.59 (22.47 to 45.78)    | 0.88 (0.60 to 1.25)        | 0.5725           |
|                            | <i>P for trend of AAIR</i> |            |        |                           |                            | <i>0.0913</i>    |
| Female/CRC                 | 0%                         | 11,272,794 | 3,788  | 26.54 (25.68 to 27.41)    | 1.00                       |                  |
|                            | 0<-<10%                    | 3,735,408  | 1,019  | 24.55 (23.04 to 26.14)    | <b>0.93 (0.86 to 0.99)</b> | <b>0.0334</b>    |
|                            | 10%<-<20%                  | 663,376    | 193    | 26.21 (22.59 to 30.25)    | 0.99 (0.85 to 1.15)        | 0.9249           |
|                            | 20%<-<30%                  | 128,369    | 47     | 29.51 (21.59 to 39.44)    | 1.11 (0.81 to 1.50)        | 0.5125           |
|                            | 30%<-<40%                  | 56,921     | 18     | 23.85 (13.93 to 37.96)    | 0.90 (0.52 to 1.46)        | 0.8162           |
|                            | 40%<-<50%                  | 31,260     | <15    | —                         | —                          | —                |
|                            | 50%+                       | 112,869    | 37     | 27.91 (19.42 to 39.00)    | 1.05 (0.73 to 1.48)        | 0.7829           |
|                            | <i>P for trend of AAIR</i> |            |        |                           |                            |                  |

|                      |                            |            |     |                     |                     |               |
|----------------------|----------------------------|------------|-----|---------------------|---------------------|---------------|
|                      | <i>P for trend of AAIR</i> |            |     |                     |                     | <i>0.3587</i> |
| Male/Melanoma        | 0%                         | 10,222,964 | 123 | 1.12 (0.93 to 1.34) | 1.00                |               |
|                      | 0<-<10%                    | 3,372,416  | 37  | 1.20 (0.84 to 1.67) | 1.07 (0.71 to 1.59) | 0.7855        |
|                      | 10%<-20%                   | 600,871    | <15 | —                   | —                   | —             |
|                      | 20%<-30%                   | 135,984    | <15 | —                   | —                   | —             |
|                      | 30%<-40%                   | 62,121     | <15 | —                   | —                   | —             |
|                      | 40%<-50%                   | 28,831     | <15 | —                   | —                   | —             |
|                      | 50%+                       | 87,242     | <15 | —                   | —                   | —             |
|                      | <i>P for trend of AAIR</i> |            |     |                     |                     | <i>0.0207</i> |
| Female/Melanoma<br>a | 0%                         | 11,272,794 | 166 | 1.23 (1.05 to 1.44) | 1.00                |               |
|                      | 0<-<10%                    | 3,735,408  | 50  | 1.23 (0.91 to 1.63) | 1.00 (0.70 to 1.39) | 1.0000        |
|                      | 10%<-20%                   | 663,376    | <15 | —                   | —                   | —             |
|                      | 20%<-30%                   | 128,369    | <15 | —                   | —                   | —             |
|                      | 30%<-40%                   | 56,921     | <15 | —                   | —                   | —             |
|                      | 40%<-50%                   | 31,260     | <15 | —                   | —                   | —             |
|                      | 50%+                       | 112,869    | <15 | —                   | —                   | —             |
|                      | <i>P for trend of AAIR</i> |            |     |                     |                     | <i>0.2125</i> |

California Department of Public Health guidelines restrict reporting of cancer incidence rates if based on <15 cancer cases and/or a population of <10,000 to ensure confidentiality and stable statistical rates.

**Supplementary Table 4. Age-adjusted incidence rates (AAIR) and incidence rate ratios (IRR) and 95% confidence interval by % rural in California (2015-2019), non-Hispanic Black.**

| Cancer Site   | %Rural                     | NH Black   |       |                           |                            | P-value          |
|---------------|----------------------------|------------|-------|---------------------------|----------------------------|------------------|
|               |                            | Population | Case  | AAIR                      | IRR                        |                  |
| Breast        | 0%                         | 4,169,198  | 6,002 | 125.82 (122.57 to 129.13) | 1.00                       |                  |
|               | 0<-<10%                    | 1,508,302  | 2,030 | 129.75 (124.01 to 135.70) | 1.03 (0.98 to 1.09)        | 0.2386           |
|               | 10%<-<20%                  | 223,916    | 304   | 127.58 (113.25 to 143.21) | 1.01 (0.90 to 1.14)        | 0.8273           |
|               | 20%<-<30%                  | 52,239     | 71    | 120.62 (93.48 to 153.02)  | 0.96 (0.74 to 1.23)        | 0.8384           |
|               | 30%<-<40%                  | 33,601     | 36    | 88.69 (61.03 to 124.73)   | 0.70 (0.48 to 1.01)        | 0.0556           |
|               | 40%<-<50%                  | 33,180     | 55    | 124.18 (92.24 to 163.54)  | 0.99 (0.73 to 1.31)        | 1.0000           |
|               | 50%+                       | 48,637     | 51    | 82.26 (60.26 to 109.80)   | <b>0.65 (0.48 to 0.88)</b> | <b>0.0036</b>    |
|               | <i>P for trend of AAIR</i> |            |       |                           |                            | <i>0.1269</i>    |
| Prostate      | 0%                         | 3,881,722  | 5,907 | 139.39 (135.73 to 143.13) | 1.00                       |                  |
|               | 0<-<10%                    | 1,570,358  | 2,474 | 167.48 (160.53 to 174.65) | <b>1.20 (1.14 to 1.26)</b> | <b>&lt;.0001</b> |
|               | 10%<-<20%                  | 288,942    | 380   | 146.86 (131.55 to 163.43) | 1.05 (0.94 to 1.18)        | 0.3547           |
|               | 20%<-<30%                  | 74,767     | 109   | 145.06 (116.65 to 178.25) | 1.04 (0.84 to 1.31)        | 0.6781           |
|               | 30%<-<40%                  | 36,182     | 61    | 111.19 (82.45 to 146.79)  | 0.80 (0.59 to 1.08)        | 0.1499           |
|               | 40%<-<50%                  | 30,464     | 73    | 128.70 (97.72 to 166.37)  | 0.92 (0.70 to 1.23)        | 0.7882           |
|               | 50%+                       | 81,334     | 75    | 93.57 (71.99 to 119.48)   | <b>0.67 (0.52 to 0.87)</b> | <b>0.0014</b>    |
|               | <i>P for trend of AAIR</i> |            |       |                           |                            | <i>0.5494</i>    |
| Male/Lung     | 0%                         | 3,881,722  | 2,233 | 59.64 (57.10 to 62.27)    | 1.00                       |                  |
|               | 0<-<10%                    | 1,570,358  | 724   | 58.41 (53.95 to 63.13)    | 0.98 (0.89 to 1.07)        | 0.6608           |
|               | 10%<-<20%                  | 288,942    | 112   | 53.15 (43.26 to 64.49)    | 0.89 (0.72 to 1.09)        | 0.3156           |
|               | 20%<-<30%                  | 74,767     | 45    | 79.76 (55.71 to 109.80)   | 1.34 (0.93 to 1.91)        | 0.0938           |
|               | 30%<-<40%                  | 36,182     | 33    | 70.10 (45.58 to 102.48)   | 1.18 (0.76 to 1.78)        | 0.4656           |
|               | 40%<-<50%                  | 30,464     | 29    | 51.51 (33.65 to 75.86)    | 0.86 (0.56 to 1.29)        | 0.5943           |
|               | 50%+                       | 81,334     | 31    | 46.46 (30.53 to 67.28)    | 0.78 (0.51 to 1.17)        | 0.2637           |
|               | <i>P for trend of AAIR</i> |            |       |                           |                            | <i>0.1865</i>    |
| Female/Lung   | 0%                         | 4,169,198  | 2,261 | 44.52 (42.68 to 46.43)    | 1.00                       |                  |
|               | 0<-<10%                    | 1,508,302  | 698   | 45.81 (42.37 to 49.45)    | 1.03 (0.94 to 1.12)        | 0.5111           |
|               | 10%<-<20%                  | 223,916    | 91    | 37.53 (30.02 to 46.35)    | 0.84 (0.67 to 1.05)        | 0.1421           |
|               | 20%<-<30%                  | 52,239     | 21    | 39.84 (24.36 to 61.03)    | 0.89 (0.55 to 1.40)        | 0.7731           |
|               | 30%<-<40%                  | 33,601     | <15   | —                         | —                          | —                |
|               | 40%<-<50%                  | 33,180     | 20    | 46.97 (27.90 to 73.89)    | 1.05 (0.63 to 1.70)        | 0.8688           |
|               | 50%+                       | 48,637     | 19    | 32.90 (19.42 to 52.22)    | 0.74 (0.44 to 1.21)        | 0.3044           |
|               | <i>P for trend of AAIR</i> |            |       |                           |                            | <i>0.1216</i>    |
| Male/CRC      | 0%                         | 3,881,722  | 1,705 | 44.68 (42.50 to 46.93)    | 1.00                       |                  |
|               | 0<-<10%                    | 1,570,358  | 586   | 43.21 (39.56 to 47.09)    | 0.97 (0.87 to 1.07)        | 0.5231           |
|               | 10%<-<20%                  | 288,942    | 114   | 46.15 (37.57 to 56.04)    | 1.03 (0.84 to 1.27)        | 0.7569           |
|               | 20%<-<30%                  | 74,767     | 24    | 36.61 (21.74 to 57.17)    | 0.82 (0.49 to 1.38)        | 0.7289           |
|               | 30%<-<40%                  | 36,182     | <15   | —                         | —                          | —                |
|               | 40%<-<50%                  | 30,464     | 21    | 32.51 (19.56 to 51.66)    | 0.73 (0.44 to 1.17)        | 0.2365           |
|               | 50%+                       | 81,334     | 15    | 16.51 (8.91 to 28.28)     | <b>0.37 (0.20 to 0.68)</b> | <b>0.0001</b>    |
|               | <i>P for trend of AAIR</i> |            |       |                           |                            | <b>0.0077</b>    |
| Female/CRC    | 0%                         | 4,169,198  | 1,697 | 34.77 (33.10 to 36.50)    | 1.00                       |                  |
|               | 0<-<10%                    | 1,508,302  | 580   | 37.70 (34.61 to 40.99)    | 1.08 (0.98 to 1.20)        | 0.1063           |
|               | 10%<-<20%                  | 223,916    | 77    | 34.06 (26.73 to 42.75)    | 0.98 (0.76 to 1.24)        | 0.9629           |
|               | 20%<-<30%                  | 52,239     | <15   | —                         | —                          | —                |
|               | 30%<-<40%                  | 33,601     | <15   | —                         | —                          | —                |
|               | 40%<-<50%                  | 33,180     | <15   | —                         | —                          | —                |
|               | 50%+                       | 48,637     | <15   | —                         | —                          | —                |
|               | <i>P for trend of AAIR</i> |            |       |                           |                            | <i>0.1774</i>    |
| Male/Melanoma | 0%                         | 3,881,722  | 45    | 1.29 (0.94 to 1.74)       | 1.00                       |                  |

|                     |                                |           |     |                     |                            |               |
|---------------------|--------------------------------|-----------|-----|---------------------|----------------------------|---------------|
|                     | 0<-<10%                        | 1,570,358 | 19  | 1.62 (0.93 to 2.57) | 1.25 (0.66 to 2.32)        | 0.5387        |
|                     | 10%-<20%                       | 288,942   | <15 | —                   | —                          | —             |
|                     | 20%-<30%                       | 74,767    | <15 | —                   | —                          | —             |
|                     | 30%-<40%                       | 36,182    | <15 | —                   | —                          | —             |
|                     | 40%-<50%                       | 30,464    | <15 | —                   | —                          | —             |
|                     | 50%+                           | 81,334    | <15 | —                   | —                          | —             |
|                     | <i>P for trend<br/>of AAIR</i> |           |     |                     |                            | <i>0.0844</i> |
| Female/Melanom<br>a | 0%                             | 4,169,198 | 32  | 0.72 (0.49 to 1.02) | 1.00                       |               |
|                     | 0<-<10%                        | 1,508,302 | 20  | 1.38 (0.83 to 2.16) | <b>1.93 (1.01 to 3.58)</b> | <b>0.0486</b> |
|                     | 10%-<20%                       | 223,916   | <15 | —                   | —                          | —             |
|                     | 20%-<30%                       | 52,239    | <15 | —                   | —                          | —             |
|                     | 30%-<40%                       | 33,601    | <15 | —                   | —                          | —             |
|                     | 40%-<50%                       | 33,180    | <15 | —                   | —                          | —             |
|                     | 50%+                           | 48,637    | <15 | —                   | —                          | —             |
|                     | <i>P for trend<br/>of AAIR</i> |           |     |                     |                            | <i>0.6800</i> |

California Department of Public Health guidelines restrict reporting of cancer incidence rates if based on <15 cancer cases and/or a population of <10,000 to ensure confidentiality and stable statistical rates.



**Supplementary Table 5. Age-adjusted incidence rates (AAIR) and incidence rate ratios (IRR) and 95% confidence interval by % rural in California (2015-2019), non-Hispanic White.**

| NH White      |                            |            |        |                           |                            |                  |
|---------------|----------------------------|------------|--------|---------------------------|----------------------------|------------------|
| Cancer Site   | %Rural                     | Population | Case   | AAIR                      | IRR                        | P-value          |
| Breast        | 0%                         | 17,996,418 | 36,673 | 143.39 (141.83 to 144.97) | 1.00                       |                  |
|               | 0<-<10%                    | 12,062,320 | 24,784 | 142.09 (140.21 to 143.99) | 0.99 (0.97 to 1.01)        | 0.3188           |
|               | 10%<-<20%                  | 3,324,591  | 6,961  | 136.42 (132.96 to 139.97) | <b>0.95 (0.93 to 0.98)</b> | <b>0.0005</b>    |
|               | 20%<-<30%                  | 1,164,398  | 2,263  | 131.75 (126.01 to 137.72) | <b>0.92 (0.88 to 0.96)</b> | <b>0.0003</b>    |
|               | 30%<-<40%                  | 792,855    | 1,391  | 117.45 (110.69 to 124.54) | <b>0.82 (0.77 to 0.87)</b> | <b>&lt;.0001</b> |
|               | 40%<-<50%                  | 748,211    | 1,501  | 123.10 (116.16 to 130.38) | <b>0.86 (0.81 to 0.91)</b> | <b>&lt;.0001</b> |
|               | 50%+                       | 2,027,437  | 3,956  | 117.03 (112.98 to 121.21) | <b>0.82 (0.79 to 0.85)</b> | <b>&lt;.0001</b> |
|               | <i>P for trend of AAIR</i> |            |        |                           |                            |                  |
| Prostate      | 0%                         | 18,146,692 | 25,732 | 96.33 (95.13 to 97.53)    | 1.00                       |                  |
|               | 0<-<10%                    | 11,886,780 | 18,692 | 101.91 (100.42 to 103.41) | <b>1.06 (1.04 to 1.08)</b> | <b>&lt;.0001</b> |
|               | 10%<-<20%                  | 3,253,535  | 5,393  | 98.73 (96.05 to 101.48)   | 1.02 (0.99 to 1.06)        | 0.1147           |
|               | 20%<-<30%                  | 1,175,071  | 1,838  | 96.58 (92.09 to 101.27)   | 1.00 (0.95 to 1.05)        | 0.9246           |
|               | 30%<-<40%                  | 809,473    | 1,273  | 92.11 (86.96 to 97.53)    | 0.96 (0.90 to 1.01)        | 0.1531           |
|               | 40%<-<50%                  | 754,404    | 1,346  | 93.14 (88.07 to 98.51)    | 0.97 (0.91 to 1.02)        | 0.2848           |
|               | 50%+                       | 2,065,010  | 3,556  | 89.06 (86.04 to 92.19)    | <b>0.92 (0.89 to 0.96)</b> | <b>&lt;.0001</b> |
|               | <i>P for trend of AAIR</i> |            |        |                           |                            |                  |
| Male/Lung     | 0%                         | 18,146,692 | 12,129 | 47.97 (47.10 to 48.85)    | 1.00                       |                  |
|               | 0<-<10%                    | 11,886,780 | 8,043  | 46.81 (45.77 to 47.87)    | 0.98 (0.95 to 1.00)        | 0.0968           |
|               | 10%<-<20%                  | 3,253,535  | 2,482  | 48.62 (46.68 to 50.62)    | 1.01 (0.97 to 1.06)        | 0.5569           |
|               | 20%<-<30%                  | 1,175,071  | 910    | 52.28 (48.84 to 55.93)    | <b>1.09 (1.02 to 1.17)</b> | <b>0.0171</b>    |
|               | 30%<-<40%                  | 809,473    | 697    | 54.03 (49.95 to 58.40)    | <b>1.13 (1.04 to 1.22)</b> | <b>0.0038</b>    |
|               | 40%<-<50%                  | 754,404    | 597    | 45.45 (41.74 to 49.47)    | 0.95 (0.87 to 1.04)        | 0.2634           |
|               | 50%+                       | 2,065,010  | 1,919  | 52.05 (49.65 to 54.57)    | <b>1.09 (1.03 to 1.14)</b> | <b>0.0015</b>    |
|               | <i>P for trend of AAIR</i> |            |        |                           |                            |                  |
| Female/Lung   | 0%                         | 17,996,418 | 12,788 | 42.22 (41.47 to 42.98)    | 1.00                       |                  |
|               | 0<-<10%                    | 12,062,320 | 8,825  | 43.64 (42.71 to 44.58)    | <b>1.03 (1.01 to 1.06)</b> | <b>0.0188</b>    |
|               | 10%<-<20%                  | 3,324,591  | 2,578  | 43.50 (41.79 to 45.28)    | 1.03 (0.99 to 1.08)        | 0.1815           |
|               | 20%<-<30%                  | 1,164,398  | 835    | 44.12 (41.08 to 47.35)    | 1.04 (0.97 to 1.13)        | 0.2440           |
|               | 30%<-<40%                  | 792,855    | 723    | 51.21 (47.43 to 55.27)    | <b>1.21 (1.12 to 1.31)</b> | <b>&lt;.0001</b> |
|               | 40%<-<50%                  | 748,211    | 627    | 44.17 (40.64 to 48.00)    | 1.05 (0.96 to 1.14)        | 0.2946           |
|               | 50%+                       | 2,027,437  | 1,867  | 47.82 (45.58 to 50.16)    | <b>1.13 (1.08 to 1.19)</b> | <b>&lt;.0001</b> |
|               | <i>P for trend of AAIR</i> |            |        |                           |                            |                  |
| Male/CRC      | 0%                         | 18,146,692 | 9,680  | 40.01 (39.19 to 40.84)    | 1.00                       |                  |
|               | 0<-<10%                    | 11,886,780 | 6,295  | 38.92 (37.93 to 39.93)    | 0.97 (0.94 to 1.01)        | 0.1008           |
|               | 10%<-<20%                  | 3,253,535  | 1,795  | 38.12 (36.29 to 40.03)    | 0.95 (0.90 to 1.01)        | 0.0817           |
|               | 20%<-<30%                  | 1,175,071  | 701    | 42.76 (39.50 to 46.24)    | 1.07 (0.98 to 1.16)        | 0.1106           |
|               | 30%<-<40%                  | 809,473    | 479    | 40.43 (36.68 to 44.50)    | 1.01 (0.91 to 1.12)        | 0.8273           |
|               | 40%<-<50%                  | 754,404    | 431    | 37.50 (33.76 to 41.58)    | 0.94 (0.84 to 1.04)        | 0.2577           |
|               | 50%+                       | 2,065,010  | 1,282  | 37.89 (35.67 to 40.24)    | 0.95 (0.89 to 1.01)        | 0.1027           |
|               | <i>P for trend of AAIR</i> |            |        |                           |                            |                  |
| Female/CRC    | 0%                         | 17,996,418 | 8,728  | 31.47 (30.76 to 32.18)    | 1.00                       |                  |
|               | 0<-<10%                    | 12,062,320 | 5,907  | 31.87 (31.01 to 32.75)    | 1.01 (0.98 to 1.05)        | 0.4824           |
|               | 10%<-<20%                  | 3,324,591  | 1,643  | 30.70 (29.12 to 32.35)    | 0.98 (0.92 to 1.03)        | 0.4304           |
|               | 20%<-<30%                  | 1,164,398  | 581    | 33.78 (30.92 to 36.85)    | 1.07 (0.98 to 1.18)        | 0.1257           |
|               | 30%<-<40%                  | 792,855    | 367    | 29.31 (26.12 to 32.83)    | 0.93 (0.83 to 1.05)        | 0.2728           |
|               | 40%<-<50%                  | 748,211    | 381    | 30.26 (26.98 to 33.89)    | 0.96 (0.86 to 1.08)        | 0.5787           |
|               | 50%+                       | 2,027,437  | 1,132  | 32.43 (30.40 to 34.58)    | 1.03 (0.96 to 1.10)        | 0.3980           |
|               | <i>P for trend of AAIR</i> |            |        |                           |                            |                  |
| Male/Melanoma | 0%                         | 18,146,692 | 11,838 | 48.46 (47.56 to 49.36)    | 1.00                       |                  |

|                 |                                |            |       |                        |                            |                  |
|-----------------|--------------------------------|------------|-------|------------------------|----------------------------|------------------|
|                 | 0<-<10%                        | 11,886,780 | 8,724 | 53.66 (52.50 to 54.84) | <b>1.11 (1.08 to 1.14)</b> | <b>&lt;.0001</b> |
|                 | 10%-<20%                       | 3,253,535  | 2,423 | 50.62 (48.52 to 52.79) | 1.04 (1.00 to 1.09)        | 0.0628           |
|                 | 20%-<30%                       | 1,175,071  | 794   | 48.49 (45.02 to 52.17) | 1.00 (0.93 to 1.08)        | 0.9891           |
|                 | 30%-<40%                       | 809,473    | 439   | 36.01 (32.52 to 39.81) | <b>0.74 (0.67 to 0.82)</b> | <b>&lt;.0001</b> |
|                 | 40%-<50%                       | 754,404    | 493   | 39.31 (35.66 to 43.28) | <b>0.81 (0.73 to 0.90)</b> | <b>&lt;.0001</b> |
|                 | 50%+                           | 2,065,010  | 1,373 | 40.75 (38.44 to 43.18) | <b>0.84 (0.79 to 0.89)</b> | <b>&lt;.0001</b> |
|                 | <i>P for trend<br/>of AAIR</i> |            |       |                        |                            | <i>0.1181</i>    |
| Female/Melanoma | 0%                             | 17,996,418 | 7,274 | 29.56 (28.84 to 30.30) | 1.00                       |                  |
|                 | 0<-<10%                        | 12,062,320 | 5,227 | 31.71 (30.79 to 32.65) | <b>1.07 (1.03 to 1.11)</b> | <b>0.0004</b>    |
|                 | 10%-<20%                       | 3,324,591  | 1,501 | 31.48 (29.75 to 33.30) | <b>1.06 (1.00 to 1.13)</b> | <b>0.0480</b>    |
|                 | 20%-<30%                       | 1,164,398  | 504   | 32.43 (29.45 to 35.64) | 1.10 (0.99 to 1.21)        | 0.0674           |
|                 | 30%-<40%                       | 792,855    | 259   | 22.62 (19.64 to 25.95) | <b>0.77 (0.66 to 0.88)</b> | <b>0.0001</b>    |
|                 | 40%-<50%                       | 748,211    | 319   | 26.86 (23.66 to 30.41) | 0.91 (0.80 to 1.03)        | 0.1649           |
|                 | 50%+                           | 2,027,437  | 791   | 25.82 (23.79 to 28.00) | <b>0.87 (0.80 to 0.95)</b> | <b>0.0016</b>    |
|                 | <i>P for trend<br/>of AAIR</i> |            |       |                        |                            | <i>0.2305</i>    |
